# Supplementary material
Source: PubMed Central journal article supplement (PMC10469300)
Supplement: jamapsychiatry-e233161-s002.pdf [file jamapsychiatry-e233161-s002.pdf]

## Data Sharing Statement

Koc. Prenatal Antidepressant Exposure and Offspring Brain Morphologic Trajectory. *JAMA Psychiatry*. Published August 30, 2023. doi:10.1001/jamapsychiatry.2023.3161

**Data** The datasets generated and/or analyzed during the current study are not publicly available due to legal and ethical regulations, but may be made available upon request to the Director of the Generation R Study, Vincent Jaddoe ([v.jaddoe@erasmusmc.nl](mailto:v.jaddoe@erasmusmc.nl)) in accordance with the local, national, and European Union regulations.

**Data available:** No
